# Supplementary material for: A Generic, Scalable, and Rapid Time-Resolved Förster Resonance Energy Transfer-Based Assay for Antigen Detection—SARS-CoV-2 as a Proof of Concept
Source: PubMed Central journal article supplement (PMC8262888; doi:10.1128/mbio.00902-21), 2021-05-18
Supplement: mbio.00902-21-sf006.pdf [file mbio.00902-21-sf006.pdf]

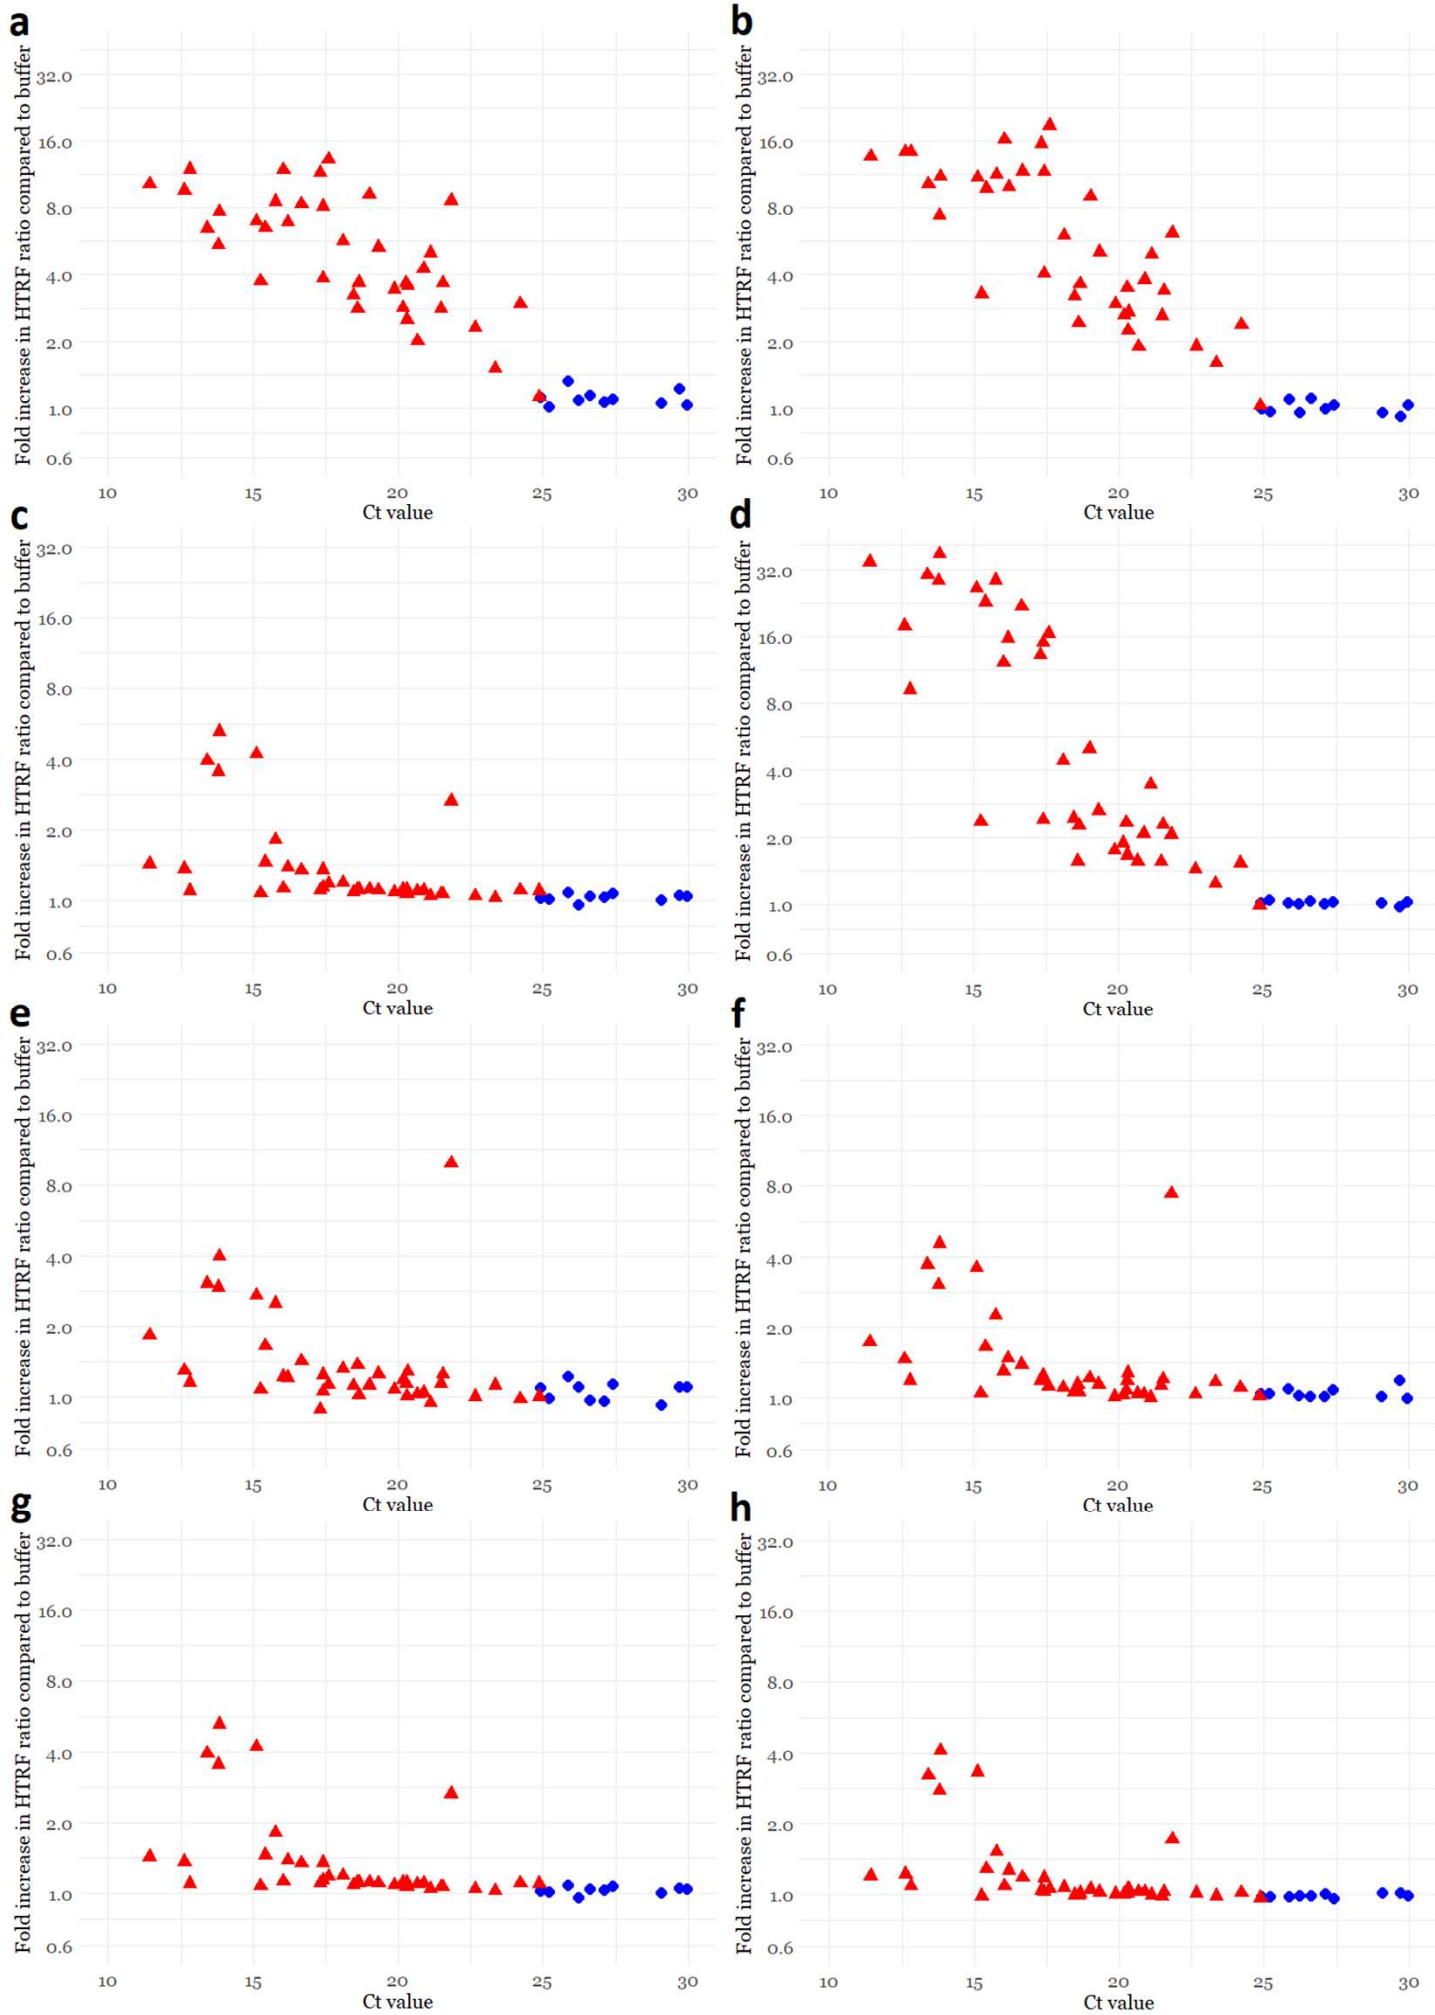

**Figure S6.**
