# Supplementary material for: A Generic, Scalable, and Rapid Time-Resolved Förster Resonance Energy Transfer-Based Assay for Antigen Detection—SARS-CoV-2 as a Proof of Concept
Source: PubMed Central journal article supplement (PMC8262888; doi:10.1128/mbio.00902-21), 2021-05-18
Supplement: mbio.00902-21-st001.pdf [file mbio.00902-21-st001.pdf]

| HTRF ratio compared to average of mock media 1:1 and 1:100 |           |      |      |       |        |  |                         |       |  |
|------------------------------------------------------------|-----------|------|------|-------|--------|--|-------------------------|-------|--|
|                                                            | 10 µl VE6 |      |      |       |        |  | 10 µl VE6<br>mock-media |       |  |
|                                                            | 1:1       | 1:10 | 1:50 | 1:100 | 1:1000 |  | 1:1                     | 1:100 |  |
| anti-NP 10 nM Eu + 10 nM AF                                | 18.8      | 15.9 | 4.4  | 2.7   | 1.2    |  | 1.0                     | 1.0   |  |
| anti-NP 20 nM Eu + 20 nM AF                                | 26.1      | 12.8 | 3.7  | 2.5   | 1.2    |  | 1.0                     | 1.0   |  |
| anti-NP 40 nM Eu + 40 nM AF                                | 45.0      | 10.4 | 2.9  | 2.1   | 1.1    |  | 1.0                     | 1.0   |  |
| anti-NP 80 nM Eu + 80 nM AF                                | 39.5      | 7.0  | 2.2  | 1.7   | 1.1    |  | 1.0                     | 1.0   |  |
| anti-NP 13 nM Eu + 27 nM AF                                | 23.0      | 16.5 | 4.5  | 2.8   | 1.2    |  | 1.0                     | 1.0   |  |
| anti-NP 27 nM Eu + 13 nM AF                                | 13.0      | 14.9 | 4.5  | 2.8   | 1.2    |  | 1.0                     | 1.0   |  |
|                                                            |           |      |      |       |        |  |                         |       |  |
| anti-RBD 10 nM Eu + 10 nM AF                               | 3.6       | 1.3  | 1.3  | 1.1   | 1.1    |  | 1.0                     | 1.0   |  |
| anti-RBD 20 nM Eu + 20 nM AF                               | 3.3       | 1.3  | 1.1  | 1.0   | 1.0    |  | 1.0                     | 1.0   |  |
| anti-RBD 40 nM Eu + 40 nM AF                               | 2.7       | 1.2  | 1.1  | 1.0   | 1.0    |  | 1.0                     | 1.0   |  |
| anti-RBD 80 nM Eu + 80 nM AF                               | 2.3       | 1.2  | 1.0  | 1.0   | 1.0    |  | 1.0                     | 1.0   |  |
| anti-RBD 13 nM Eu + 27 nM AF                               | 3.1       | 1.2  | 1.0  | 1.0   | 0.9    |  | 1.0                     | 1.0   |  |
| anti-RBD 27 nM Eu + 13 nM AF                               | 2.3       | 1.1  | 1.0  | 1.1   | 1.0    |  | 1.0                     | 1.0   |  |

**Table S1.**
